# Supplementary material for: Palatability and Stability Studies to Optimize a Carvedilol Oral Liquid Formulation for Pediatric Use
Source: MDPI journal article supplement (doi:10.3390/pharmaceutics16010030), 2023-12-25
Supplement: s1 [file s1]

## INFORME DEL COMITÉ DE ÉTICA DE LA INVESTIGACIÓN SOBRE ENMIENDAS A PROYECTOS DE INVESTIGACIÓN BIOMÉDICA

El Comité de Ética de la Investigación del Hospital Universitari de Bellvitge, en su reunión de fecha 13 de Julio de 2023 (Acta 18//23), tras examinar toda la documentación presentada sobre el proyecto de investigación con nuestra Ref. **PR103/22**, titulado:

“ESTUDIO DE PALATABILIDAD DE UNA NUEVA FORMULACIÓN DE CARVEDILOL LÍQUIDA ORAL INDICADA PARA PEDIATRÍA”, código: **PDG\_CARVEDILOL\_01\_01**

Documentos modificados:

- Protocolo versión de fecha 30/06/23.
- Hoja de información al paciente y consentimiento informado versión de fecha 30/06/23.
- Modificación del código de protocolo, anterior: PDG\_CARVEDILOL\_01\_03.

Presentado por la Sra. Blanca Chiclana Rodríguez, Estudiante de Doctorado, del Departamento de Farmacia, Tecnología Farmacéutica y Fisicoquímica del Universitat de Barcelona, como Doctoranda, y Dirigida por la Dra. Pilar Pérez Lozano y Dra. Encarna García Montoya, del Departamento de Farmacia, Tecnología Farmacéutica y Fisicoquímica de la Universitat de Barcelona, ha acordado emitir INFORME FAVORABLE a la documentación mencionada.

Que la composición actual del Comité de Ética de la Investigación es la siguiente:

|                |                                  |                                            |
|----------------|----------------------------------|--------------------------------------------|
| Presidente     | Dr. Francesc Esteve Urbano       | Médico - Medicina Intensiva                |
| Vicepresidenta | Dra. Pilar Hereu Boher           | Médico - Farmacología Clínica              |
| Secretario     | Dr. Enric Sospedra Martínez      | Farmacéutico - Farmacia Hospitalaria       |
| Vocales:       | Dr. Jordi Adamuz Tomás           | Enfermero – Enfermería                     |
|                | Sra. Anna Boix Traserra          | Derecho - DPD                              |
|                | Dra. Nuria Calaf Figueras        | Farmacéutica – Atención Primaria           |
|                | Dra. Concepción Cañete Ramos     | Médico - Neumología                        |
|                | Dra. Sara Cobo Sacristán         | Farmacéutica – Farmacia Hospitalaria       |
|                | Dr. José Luis Ferreiro Gutiérrez | Médico - Cardiología                       |
|                | Dra. Ana María Ferrer Artola     | Farmacéutica - Miembro sanitario           |
|                | Sra. Esther Ferrer Canals        | Representante de los pacientes             |
|                | Dr. Xavier Fulladosa Oliveras    | Médico - Nefrología                        |
|                | Dr. Carles Lladó i Carbonell     | Médico - Urología                          |
|                | Dra. Sara Larriba Bartolomé      | Farmacia - Sanitario                       |
|                | Sra. Sonia López Ortega          | Graduado Social - Atención a la Ciudadanía |
|                | Dr. Antoni Lorente Martínez      | Ingeniería – Miembro no sanitario          |
|                | Dr. Juan Jesús Martín Liberal    | Médico - Oncología Médica                  |
|                | Dr. Sergio Morchón Ramos         | Médico - Medicina Preventiva               |
|                | Dr. Miguel Ángel Pavón Ribas     | Biólogo- Miembro no sanitario              |

Dr. Joan Josep Queralt Jiménez  
Dra. María Teresa Terán Virtus

Jurista  
Médico - Farmacología Clínica

Que este Comité cumple la legislación española vigente para este tipo de proyectos, así como las normas ICH y las Normas de Buena Práctica Clínica.

Que en dicha reunión del Comité de Ética de la Investigación se cumplió el quórum preceptivo legalmente.

Lo que firmo en L'Hospitalet de Llobregat, a 25 de julio de 2023

**SOSPEDRA** Signat digitalment  
**MARTINEZ** per SOSPEDRA  
**ENRIQUE -** MARTINEZ  
**36986426B** ENRIQUE -  
Data: 2023.07.25  
09:51:15 +02'00'

Dr. Enric Sospedra Martínez
