# Supplementary material for: Palatability and Stability Studies to Optimize a Carvedilol Oral Liquid Formulation for Pediatric Use
Source: MDPI journal article supplement (doi:10.3390/pharmaceutics16010030), 2023-12-25
Supplement: s1 [file s1]

## TEST DE EVALUACIÓN SENSORIAL

**Título del estudio:** ESTUDIO DE PALATABILIDAD DE UNA NUEVA FORMULACIÓN DE CARVEDIOL LÍQUIDA ORAL INDICADA PARA PEDIATRÍA

**Código de protocolo:** PDG\_CARVEDIOL\_01\_01

**Información previa:**

- A continuación recibirá 10 muestras en total de una formulación destinada a la población pediátrica. En el test 1 recibirá 6 muestras y en el test 2 recibirá 4 muestras.
- Cate toda la cantidad de muestra suministrada. Sólo cátele, no la ingiera.
- Enjuague la boca con agua antes de comenzar el test y cada vez que cambie la muestra.
- Para evitar posibles alteraciones en los resultados, no hable ni comente durante la evaluación.
- Si necesita aclaración sobre el funcionamiento del test, no dude en preguntar.

**Panelista nº:**

---

### TEST 1: AROMATIZACIÓN

**REFERENCIA 1/6\_Test 1 nº:**

**1. Olor**

Huela la muestra suministrada.

1.1 El olor percibido:

- ☐ No me gusta nada
 ☐ No me gusta mucho
 ☐ Me gusta
 ☐ Me gusta mucho

1.2 Con cuál de los siguientes olores identifica la muestra:

- ☐ Fresa
 ☐ Manzana
 ☐ Plátano  
☐ Chocolate
 ☐ Vainilla
 ☐ Neutro  
☐ Ninguno de los anteriores. Especifique:

1.3 Comentarios:

**2. Sabor**

Cate la cantidad de muestra suministrada, no la ingiera.

2.1 El sabor percibido en el momento de catar la muestra:

- ☐ No me gusta nada
 ☐ No me gusta mucho
 ☐ Me gusta
 ☐ Me gusta mucho

2.2 Cuáles de los siguientes adjetivos describe mejor el sabor de la muestra (puede marcar más de una opción):

- ☐ Ácido
 ☐ Dulce
 ☐ Intenso  
☐ Amargo
 ☐ Suave
 ☐ Insípido

2.3 Una vez catada la muestra, ¿nota algún sabor residual?

- ☐ Sí
 ☐ No

2.4 En caso afirmativo, lo puede describir como:

- ☐ No me gusta nada
 ☐ No me gusta mucho
 ☐ Me gusta
 ☐ Me gusta mucho

2.5 Con cuál de los siguientes olores identifica la muestra:

- |                                                                  |                                   |                                  |
|------------------------------------------------------------------|-----------------------------------|----------------------------------|
| <input type="checkbox"/> Fresa                                   | <input type="checkbox"/> Manzana  | <input type="checkbox"/> Plátano |
| <input type="checkbox"/> Chocolate                               | <input type="checkbox"/> Vainilla | <input type="checkbox"/> Neutro  |
| <input type="checkbox"/> Ninguno de los anteriores. Especifique: |                                   |                                  |

2.6 Comentarios

3. ¿Qué puntuación designaría a la fórmula objeto de estudio? (puede indicar decimales)

1 – 2 – 3 – 4 – 5 – 6 – 7 – 8 – 9 – 10

4. Comentarios adicionales

#### REFERENCIA 2/6\_Test 1 nº:

##### 1. Olor

Huela la muestra suministrada.

1.1 El olor percibido:

- |                                           |                                            |                                   |                                         |
|-------------------------------------------|--------------------------------------------|-----------------------------------|-----------------------------------------|
| <input type="checkbox"/> No me gusta nada | <input type="checkbox"/> No me gusta mucho | <input type="checkbox"/> Me gusta | <input type="checkbox"/> Me gusta mucho |
|-------------------------------------------|--------------------------------------------|-----------------------------------|-----------------------------------------|

1.2 Con cuál de los siguientes olores identifica la muestra:

- |                                                                  |                                   |                                  |
|------------------------------------------------------------------|-----------------------------------|----------------------------------|
| <input type="checkbox"/> Fresa                                   | <input type="checkbox"/> Manzana  | <input type="checkbox"/> Plátano |
| <input type="checkbox"/> Chocolate                               | <input type="checkbox"/> Vainilla | <input type="checkbox"/> Neutro  |
| <input type="checkbox"/> Ninguno de los anteriores. Especifique: |                                   |                                  |

1.3 Comentarios:

##### 2. Sabor

Cate la cantidad de muestra suministrada, no la ingiera.

2.1 El sabor percibido en el momento de catar la muestra:

- |                                           |                                            |                                   |                                         |
|-------------------------------------------|--------------------------------------------|-----------------------------------|-----------------------------------------|
| <input type="checkbox"/> No me gusta nada | <input type="checkbox"/> No me gusta mucho | <input type="checkbox"/> Me gusta | <input type="checkbox"/> Me gusta mucho |
|-------------------------------------------|--------------------------------------------|-----------------------------------|-----------------------------------------|

2.2 Cuáles de los siguientes adjetivos describe mejor el sabor de la muestra (puede marcar más de una opción):

- |                                 |                                |                                   |
|---------------------------------|--------------------------------|-----------------------------------|
| <input type="checkbox"/> Ácido  | <input type="checkbox"/> Dulce | <input type="checkbox"/> Intenso  |
| <input type="checkbox"/> Amargo | <input type="checkbox"/> Suave | <input type="checkbox"/> Insípido |

2.3 Una vez catada la muestra, ¿nota algún sabor residual?

- |                             |                             |
|-----------------------------|-----------------------------|
| <input type="checkbox"/> Sí | <input type="checkbox"/> No |
|-----------------------------|-----------------------------|

2.4 En caso afirmativo, lo puede describir como:

- |                                           |                                            |                                   |                                         |
|-------------------------------------------|--------------------------------------------|-----------------------------------|-----------------------------------------|
| <input type="checkbox"/> No me gusta nada | <input type="checkbox"/> No me gusta mucho | <input type="checkbox"/> Me gusta | <input type="checkbox"/> Me gusta mucho |
|-------------------------------------------|--------------------------------------------|-----------------------------------|-----------------------------------------|

2.5 Con cuál de los siguientes olores identifica la muestra:

- |                                                                  |                                   |                                  |
|------------------------------------------------------------------|-----------------------------------|----------------------------------|
| <input type="checkbox"/> Fresa                                   | <input type="checkbox"/> Manzana  | <input type="checkbox"/> Plátano |
| <input type="checkbox"/> Chocolate                               | <input type="checkbox"/> Vainilla | <input type="checkbox"/> Neutro  |
| <input type="checkbox"/> Ninguno de los anteriores. Especifique: |                                   |                                  |

2.6 Comentarios

**3. ¿Qué puntuación designaría a la fórmula objeto de estudio? (puede indicar decimales)**

1 – 2 – 3 – 4 – 5 – 6 – 7 – 8 – 9 – 10

**4. Comentarios adicionales****REFERENCIA 3/6\_Test 1 nº:****1. Olor**

Huela la muestra suministrada.

**1.1 El olor percibido:**
☐ No me gusta nada      ☐ No me gusta mucho      ☐ Me gusta      ☐ Me gusta mucho
**1.2 Con cuál de los siguientes olores identifica la muestra:**
☐ Fresa      ☐ Manzana      ☐ Plátano  
☐ Chocolate      ☐ Vainilla      ☐ Neutro  
☐ Ninguno de los anteriores. Especifique:
**1.3 Comentarios:****2. Sabor**Cate la cantidad de muestra suministrada, no la ingiera.**2.1 El sabor percibido en el momento de catar la muestra:**
☐ No me gusta nada      ☐ No me gusta mucho      ☐ Me gusta      ☐ Me gusta mucho
**2.2 Cuáles de los siguientes adjetivos describe mejor el sabor de la muestra (puede marcar más de una opción):**
☐ Ácido      ☐ Dulce      ☐ Intenso  
☐ Amargo      ☐ Suave      ☐ Insípido
**2.3 Una vez catada la muestra, ¿nota algún sabor residual?**
☐ Sí      ☐ No
**2.4 En caso afirmativo, lo puede describir como:**
☐ No me gusta nada      ☐ No me gusta mucho      ☐ Me gusta      ☐ Me gusta mucho
**2.5 Con cuál de los siguientes olores identifica la muestra:**
☐ Fresa      ☐ Manzana      ☐ Plátano  
☐ Chocolate      ☐ Vainilla      ☐ Neutro  
☐ Ninguno de los anteriores. Especifique:
**2.6 Comentarios****3. ¿Qué puntuación designaría a la fórmula objeto de estudio? (puede indicar decimales)**

1 – 2 – 3 – 4 – 5 – 6 – 7 – 8 – 9 – 10

**4. Comentarios adicionales**

**REFERENCIA 4/6\_Test 1 nº:****1. Olor**

Huela la muestra suministrada.

**1.1 El olor percibido:**

- ☐ No me gusta nada      ☐ No me gusta mucho      ☐ Me gusta      ☐ Me gusta mucho

**1.2 Con cuál de los siguientes olores identifica la muestra:**

- ☐ Fresa                      ☐ Manzana                      ☐ Plátano  
☐ Chocolate                      ☐ Vainilla                      ☐ Neutro  
☐ Ninguno de los anteriores. Especifique:

**1.3 Comentarios:****2. Sabor**

Cate la cantidad de muestra suministrada, no la ingiera.

**2.1 El sabor percibido en el momento de catar la muestra:**

- ☐ No me gusta nada      ☐ No me gusta mucho      ☐ Me gusta      ☐ Me gusta mucho

**2.2 Cuáles de los siguientes adjetivos describe mejor el sabor de la muestra (puede marcar más de una opción):**

- ☐ Ácido                      ☐ Dulce                      ☐ Intenso  
☐ Amargo                      ☐ Suave                      ☐ Insípido

**2.3 Una vez catada la muestra, ¿nota algún sabor residual?**

- ☐ Sí                                      ☐ No

**2.4 En caso afirmativo, lo puede describir como:**

- ☐ No me gusta nada      ☐ No me gusta mucho      ☐ Me gusta      ☐ Me gusta mucho

**2.5 Con cuál de los siguientes olores identifica la muestra:**

- ☐ Fresa                      ☐ Manzana                      ☐ Plátano  
☐ Chocolate                      ☐ Vainilla                      ☐ Neutro  
☐ Ninguno de los anteriores. Especifique:

**2.6 Comentarios****3. ¿Qué puntuación designaría a la fórmula objeto de estudio? (puede indicar decimales)**

1    –    2    –    3    –    4    –    5    –    6    –    7    –    8    –    9    –    10

**4. Comentarios adicionales**

**REFERENCIA 5/6\_Test 1 nº:****1. Olor**

Huela la muestra suministrada.

**1.1 El olor percibido:**

- ☐ No me gusta nada      ☐ No me gusta mucho      ☐ Me gusta      ☐ Me gusta mucho

**1.2 Con cuál de los siguientes olores identifica la muestra:**

- ☐ Fresa                      ☐ Manzana                      ☐ Plátano  
☐ Chocolate              ☐ Vainilla                      ☐ Neutro  
☐ Ninguno de los anteriores. Especifique:

**1.3 Comentarios:****2. Sabor**

Cate la cantidad de muestra suministrada, no la ingiera.

**2.1 El sabor percibido en el momento de catar la muestra:**

- ☐ No me gusta nada      ☐ No me gusta mucho      ☐ Me gusta      ☐ Me gusta mucho

**2.2 Cuáles de los siguientes adjetivos describe mejor el sabor de la muestra (puede marcar más de una opción):**

- ☐ Ácido                      ☐ Dulce                      ☐ Intenso  
☐ Amargo                      ☐ Suave                      ☐ Insípido

**2.3 Una vez catada la muestra, ¿nota algún sabor residual?**

- ☐ Sí                                      ☐ No

**2.4 En caso afirmativo, lo puede describir como:**

- ☐ No me gusta nada      ☐ No me gusta mucho      ☐ Me gusta      ☐ Me gusta mucho

**2.5 Con cuál de los siguientes olores identifica la muestra:**

- ☐ Fresa                      ☐ Manzana                      ☐ Plátano  
☐ Chocolate              ☐ Vainilla                      ☐ Neutro  
☐ Ninguno de los anteriores. Especifique:

**2.6 Comentarios****3. ¿Qué puntuación designaría a la fórmula objeto de estudio? (puede indicar decimales)**

1 – 2 – 3 – 4 – 5 – 6 – 7 – 8 – 9 – 10

**4. Comentarios adicionales**

**REFERENCIA 6/6\_Test 1 nº:****1. Olor**

Huela la muestra suministrada.

**1.1 El olor percibido:**

- ☐ No me gusta nada      ☐ No me gusta mucho      ☐ Me gusta      ☐ Me gusta mucho

**1.2 Con cuál de los siguientes olores identifica la muestra:**

- ☐ Fresa                      ☐ Manzana                      ☐ Plátano  
☐ Chocolate              ☐ Vainilla                      ☐ Neutro  
☐ Ninguno de los anteriores. Especifique:

**1.3 Comentarios:****2. Sabor**

Cate la cantidad de muestra suministrada, no la ingiera.

**2.1 El sabor percibido en el momento de catar la muestra:**

- ☐ No me gusta nada      ☐ No me gusta mucho      ☐ Me gusta      ☐ Me gusta mucho

**2.2 Cuáles de los siguientes adjetivos describe mejor el sabor de la muestra (puede marcar más de una opción):**

- ☐ Ácido                      ☐ Dulce                      ☐ Intenso  
☐ Amargo                      ☐ Suave                      ☐ Insípido

**2.3 Una vez catada la muestra, ¿nota algún sabor residual?**

- ☐ Sí                                      ☐ No

**2.4 En caso afirmativo, lo puede describir como:**

- ☐ No me gusta nada      ☐ No me gusta mucho      ☐ Me gusta      ☐ Me gusta mucho

**2.5 Con cuál de los siguientes olores identifica la muestra:**

- ☐ Fresa                      ☐ Manzana                      ☐ Plátano  
☐ Chocolate              ☐ Vainilla                      ☐ Neutro  
☐ Ninguno de los anteriores. Especifique:

**2.6 Comentarios****3. ¿Qué puntuación designaría a la fórmula objeto de estudio? (puede indicar decimales)**

1    –    2    –    3    –    4    –    5    –    6    –    7    –    8    –    9    –    10

**4. Comentarios adicionales**

**TEST 2: NIVEL DE DULZOR**

A continuación recibirá 4 muestras para que evalúe principalmente el nivel de dulzor de cada una. Cate la cantidad de muestra suministrada, no la ingiera.

**REFERENCIA 1/4\_Test 2 nº:****1. Sabor**

1.1 El sabor percibido en el momento de catar la muestra:

☐ No me gusta nada      ☐ No me gusta mucho      ☐ Me gusta      ☐ Me gusta mucho

1.2 ¿Qué nivel de dulzor designaría a la fórmula objeto de estudio?

| 0              | 1 | 2     | 3 | 4 | 5      | 6 | 7        | 8 | 9 | 10     |
|----------------|---|-------|---|---|--------|---|----------|---|---|--------|
| No reconocible |   | Suave |   |   | Óptimo |   | Moderado |   |   | Fuerte |

1.3 Una vez catada la muestra, ¿nota algún sabor residual?

☐ Sí      ☐ No

1.4 En caso afirmativo, lo puede describir cómo:

☐ Especifique:

**2. Comentarios adicionales****REFERENCIA 2/4\_Test 2 nº:****1. Sabor**

1.1 El sabor percibido en el momento de catar la muestra:

☐ No me gusta nada      ☐ No me gusta mucho      ☐ Me gusta      ☐ Me gusta mucho

1.2 ¿Qué nivel de dulzor designaría a la fórmula objeto de estudio?

| 0              | 1 | 2     | 3 | 4 | 5      | 6 | 7        | 8 | 9 | 10     |
|----------------|---|-------|---|---|--------|---|----------|---|---|--------|
| No reconocible |   | Suave |   |   | Óptimo |   | Moderado |   |   | Fuerte |

1.3 Una vez catada la muestra, ¿nota algún sabor residual?

☐ Sí      ☐ No

1.4 En caso afirmativo, lo puede describir como:

☐ Especifique:

**2. Comentarios adicionales**

**REFERENCIA 3/4\_Test 2 nº:****1. Sabor**

1.1 El sabor percibido en el momento de catar la muestra:

☐ No me gusta nada      ☐ No me gusta mucho      ☐ Me gusta      ☐ Me gusta mucho

1.2 ¿Qué nivel de dulzor designaría a la fórmula objeto de estudio?

| 0                 | 1 | 2     | 3 | 4 | 5      | 6 | 7 | 8        | 9 | 10     |
|-------------------|---|-------|---|---|--------|---|---|----------|---|--------|
| No<br>reconocible |   | Suave |   |   | Óptimo |   |   | Moderado |   | Fuerte |

1.3 Una vez catada la muestra, ¿nota algún sabor residual?

☐ Sí      ☐ No

1.4 En caso afirmativo, lo puede describir cómo:

☐ Especifique:
**2. Comentarios adicionales****REFERENCIA 4/4\_Test 2 nº:****1. Sabor**

1.1 El sabor percibido en el momento de catar la muestra:

☐ No me gusta nada      ☐ No me gusta mucho      ☐ Me gusta      ☐ Me gusta mucho

1.2 ¿Qué nivel de dulzor designaría a la fórmula objeto de estudio?

| 0                 | 1 | 2     | 3 | 4 | 5      | 6 | 7 | 8        | 9 | 10     |
|-------------------|---|-------|---|---|--------|---|---|----------|---|--------|
| No<br>reconocible |   | Suave |   |   | Óptimo |   |   | Moderado |   | Fuerte |

1.3 Una vez catada la muestra, ¿nota algún sabor residual?

☐ Sí      ☐ No

1.4 En caso afirmativo, lo puede describir cómo:

☐ Especifique:
**2. Comentarios adicionales**
