# Supplementary material for: Palatability and Stability Studies to Optimize a Carvedilol Oral Liquid Formulation for Pediatric Use
Source: MDPI journal article supplement (doi:10.3390/pharmaceutics16010030), 2023-12-25
Supplement: s1 [file s1]

## TEST DE EVALUACIÓN SENSORIAL

**Título del estudio:** ESTUDIO DE PALATABILIDAD DE UNA NUEVA FORMULACIÓN DE CARVEDIOL LÍQUIDA ORAL INDICADA PARA PEDIATRÍA

**Código de protocolo:** PDG\_CARVEDIOL\_01\_01

**Información previa:**

- A continuación recibirá 8 muestras en total de una formulación destinada a la población pediátrica.
- Cate toda la cantidad de muestra suministrada. Sólo cátele, no la ingiera.
- Enjuague la boca con agua antes de comenzar el test y cada vez que cambie la muestra.
- Para evitar posibles alteraciones en los resultados, no hable ni comente durante la evaluación.
- Si necesita aclaración sobre el funcionamiento del test, no dude en preguntar.

**Panelista nº:**

---

### TEST 3: AROMATIZACIÓN

**REFERENCIA 1/8 Nº:** *(indique la muestra catada)*

**1. Olor**

Huela la muestra suministrada.

1.1 El olor percibido:

- ☐ No me gusta nada
 ☐ No me gusta mucho
 ☐ Me gusta
 ☐ Me gusta mucho

1.2 ¿Con qué olor/es identifica la muestra?: \_\_\_\_\_

1.3 Comentarios:

**2. Sabor**

Cate la cantidad de muestra suministrada, no la ingiera.

2.1 El sabor percibido en el momento de catar la muestra:

- ☐ No me gusta nada
 ☐ No me gusta mucho
 ☐ Me gusta
 ☐ Me gusta mucho

2.2 Cuáles de los siguientes adjetivos describe mejor el sabor de la muestra (puede marcar más de una opción):

- |                                 |                                |                                   |
|---------------------------------|--------------------------------|-----------------------------------|
| <input type="checkbox"/> Ácido  | <input type="checkbox"/> Dulce | <input type="checkbox"/> Intenso  |
| <input type="checkbox"/> Amargo | <input type="checkbox"/> Suave | <input type="checkbox"/> Insípido |

2.3 Una vez catada la muestra, ¿nota algún sabor residual?

- ☐ Sí
 ☐ No

2.4 En caso afirmativo, lo puede describir como:

- ☐ No me gusta nada
 ☐ No me gusta mucho
 ☐ Me gusta
 ☐ Me gusta mucho

2.5 ¿Con qué sabor/es identifica la muestra?: \_\_\_\_\_

2.6 Comentarios

**3. ¿Qué puntuación designaría a la fórmula objeto de estudio? (puede indicar decimales)**

1 – 2 – 3 – 4 – 5 – 6 – 7 – 8 – 9 – 10

**4. Comentarios adicionales**

**REFERENCIA 2/8 N°:**

**1. Olor**

Huela la muestra suministrada.

**1.1 El olor percibido:**

☐ No me gusta nada      ☐ No me gusta mucho      ☐ Me gusta      ☐ Me gusta mucho

**1.2 ¿Con qué olor/es identifica la muestra?:** \_\_\_\_\_

**1.3 Comentarios:**

**2. Sabor**

Cate la cantidad de muestra suministrada, no la ingiera.

**2.1 El sabor percibido en el momento de catar la muestra:**

☐ No me gusta nada      ☐ No me gusta mucho      ☐ Me gusta      ☐ Me gusta mucho

**2.2 Cuáles de los siguientes adjetivos describe mejor el sabor de la muestra (puede marcar más de una opción):**

☐ Ácido                      ☐ Dulce                      ☐ Intenso  
☐ Amargo                  ☐ Suave                      ☐ Insípido

**2.3 Una vez catada la muestra, ¿nota algún sabor residual?**

☐ Sí                                              ☐ No

**2.4 En caso afirmativo, lo puede describir como:**

☐ No me gusta nada      ☐ No me gusta mucho      ☐ Me gusta      ☐ Me gusta mucho

**2.5 ¿Con qué sabor/es identifica la muestra?:** \_\_\_\_\_

**2.6 Comentarios**

**3. ¿Qué puntuación designaría a la fórmula objeto de estudio? (puede indicar decimales)**

1 – 2 – 3 – 4 – 5 – 6 – 7 – 8 – 9 – 10

**4. Comentarios adicionales**

**REFERENCIA 3/8 N°:****1. Olor**

Huela la muestra suministrada.

1.1 El olor percibido:

☐ No me gusta nada      ☐ No me gusta mucho      ☐ Me gusta      ☐ Me gusta mucho

1.2 ¿Con qué olor/es identifica la muestra?: \_\_\_\_\_

1.3 Comentarios:

**2. Sabor**

Cate la cantidad de muestra suministrada, no la ingiera.

2.1 El sabor percibido en el momento de catar la muestra:

☐ No me gusta nada      ☐ No me gusta mucho      ☐ Me gusta      ☐ Me gusta mucho

2.2 Cuáles de los siguientes adjetivos describe mejor el sabor de la muestra (puede marcar más de una opción):

☐ Ácido                      ☐ Dulce                      ☐ Intenso  
☐ Amargo                      ☐ Suave                      ☐ Insípido

2.3 Una vez catada la muestra, ¿nota algún sabor residual?

☐ Sí                                      ☐ No

2.4 En caso afirmativo, lo puede describir como:

☐ No me gusta nada      ☐ No me gusta mucho      ☐ Me gusta      ☐ Me gusta mucho

2.5 ¿Con qué sabor/es identifica la muestra?: \_\_\_\_\_

2.6 Comentarios

**3. ¿Qué puntuación designaría a la fórmula objeto de estudio? (puede indicar decimales)**

1    –    2    –    3    –    4    –    5    –    6    –    7    –    8    –    9    –    10

**4. Comentarios adicionales**

**REFERENCIA 4/8 N°:****1. Olor**

Huela la muestra suministrada.

1.1 El olor percibido:

☐ No me gusta nada      ☐ No me gusta mucho      ☐ Me gusta      ☐ Me gusta mucho

1.2 ¿Con qué olor/es identifica la muestra?: \_\_\_\_\_

1.3 Comentarios:

**2. Sabor**

Cate la cantidad de muestra suministrada, no la ingiera.

2.1 El sabor percibido en el momento de catar la muestra:

☐ No me gusta nada      ☐ No me gusta mucho      ☐ Me gusta      ☐ Me gusta mucho

2.2 Cuáles de los siguientes adjetivos describe mejor el sabor de la muestra (puede marcar más de una opción):

☐ Ácido                      ☐ Dulce                      ☐ Intenso  
☐ Amargo                  ☐ Suave                      ☐ Insípido

2.3 Una vez catada la muestra, ¿nota algún sabor residual?

☐ Sí                                      ☐ No

2.4 En caso afirmativo, lo puede describir como:

☐ No me gusta nada      ☐ No me gusta mucho      ☐ Me gusta      ☐ Me gusta mucho

2.5 ¿Con qué sabor/es identifica la muestra?: \_\_\_\_\_

2.6 Comentarios

**3. ¿Qué puntuación designaría a la fórmula objeto de estudio? (puede indicar decimales)**

1    –    2    –    3    –    4    –    5    –    6    –    7    –    8    –    9    –    10

**4. Comentarios adicionales**

**REFERENCIA 5/8 N°:****1. Olor**

Huela la muestra suministrada.

1.1 El olor percibido:

☐ No me gusta nada      ☐ No me gusta mucho      ☐ Me gusta      ☐ Me gusta mucho

1.2 ¿Con qué olor/es identifica la muestra?: \_\_\_\_\_

1.3 Comentarios:

**2. Sabor**

Cate la cantidad de muestra suministrada, no la ingiera.

2.1 El sabor percibido en el momento de catar la muestra:

☐ No me gusta nada      ☐ No me gusta mucho      ☐ Me gusta      ☐ Me gusta mucho

2.2 Cuáles de los siguientes adjetivos describe mejor el sabor de la muestra (puede marcar más de una opción):

☐ Ácido                      ☐ Dulce                      ☐ Intenso  
☐ Amargo                      ☐ Suave                      ☐ Insípido

2.3 Una vez catada la muestra, ¿nota algún sabor residual?

☐ Sí                                      ☐ No

2.4 En caso afirmativo, lo puede describir como:

☐ No me gusta nada      ☐ No me gusta mucho      ☐ Me gusta      ☐ Me gusta mucho

2.5 ¿Con qué sabor/es identifica la muestra?: \_\_\_\_\_

2.6 Comentarios

**3. ¿Qué puntuación designaría a la fórmula objeto de estudio? (puede indicar decimales)**

1 – 2 – 3 – 4 – 5 – 6 – 7 – 8 – 9 – 10

**4. Comentarios adicionales**

**REFERENCIA 6/8 N°:****1. Olor**

Huela la muestra suministrada.

1.1 El olor percibido:

☐ No me gusta nada      ☐ No me gusta mucho      ☐ Me gusta      ☐ Me gusta mucho

1.2 ¿Con qué olor/es identifica la muestra?: \_\_\_\_\_

1.3 Comentarios:

**2. Sabor**

Cate la cantidad de muestra suministrada, no la ingiera.

2.1 El sabor percibido en el momento de catar la muestra:

☐ No me gusta nada      ☐ No me gusta mucho      ☐ Me gusta      ☐ Me gusta mucho

2.2 Cuáles de los siguientes adjetivos describe mejor el sabor de la muestra (puede marcar más de una opción):

☐ Ácido                      ☐ Dulce                      ☐ Intenso  
☐ Amargo                      ☐ Suave                      ☐ Insípido

2.3 Una vez catada la muestra, ¿nota algún sabor residual?

☐ Sí                                      ☐ No

2.4 En caso afirmativo, lo puede describir como:

☐ No me gusta nada      ☐ No me gusta mucho      ☐ Me gusta      ☐ Me gusta mucho

2.5 ¿Con qué sabor/es identifica la muestra?: \_\_\_\_\_

2.6 Comentarios

**3. ¿Qué puntuación designaría a la fórmula objeto de estudio? (puede indicar decimales)**

1    –    2    –    3    –    4    –    5    –    6    –    7    –    8    –    9    –    10

**4. Comentarios adicionales**

**REFERENCIA 7/8 N°:****1. Olor**

Huela la muestra suministrada.

1.1 El olor percibido:

☐ No me gusta nada      ☐ No me gusta mucho      ☐ Me gusta      ☐ Me gusta mucho

1.2 ¿Con qué olor/es identifica la muestra?: \_\_\_\_\_

1.3 Comentarios:

**2. Sabor**

Cate la cantidad de muestra suministrada, no la ingiera.

2.1 El sabor percibido en el momento de catar la muestra:

☐ No me gusta nada      ☐ No me gusta mucho      ☐ Me gusta      ☐ Me gusta mucho

2.2 Cuáles de los siguientes adjetivos describe mejor el sabor de la muestra (puede marcar más de una opción):

☐ Ácido                      ☐ Dulce                      ☐ Intenso  
☐ Amargo                      ☐ Suave                      ☐ Insípido

2.3 Una vez catada la muestra, ¿nota algún sabor residual?

☐ Sí                                      ☐ No

2.4 En caso afirmativo, lo puede describir como:

☐ No me gusta nada      ☐ No me gusta mucho      ☐ Me gusta      ☐ Me gusta mucho

2.5 ¿Con qué sabor/es identifica la muestra?: \_\_\_\_\_

2.6 Comentarios

**3. ¿Qué puntuación designaría a la fórmula objeto de estudio? (puede indicar decimales)**

2    –    2    –    3    –    4    –    5    –    6    –    7    –    8    –    9    –    10

**4. Comentarios adicionales**

**REFERENCIA 8/8 N°:****1. Olor**

Huela la muestra suministrada.

1.1 El olor percibido:

☐ No me gusta nada      ☐ No me gusta mucho      ☐ Me gusta      ☐ Me gusta mucho

1.2 ¿Con qué olor/es identifica la muestra?: \_\_\_\_\_

1.3 Comentarios:

**2. Sabor**

Cate la cantidad de muestra suministrada, no la ingiera.

2.1 El sabor percibido en el momento de catar la muestra:

☐ No me gusta nada      ☐ No me gusta mucho      ☐ Me gusta      ☐ Me gusta mucho

2.2 Cuáles de los siguientes adjetivos describe mejor el sabor de la muestra (puede marcar más de una opción):

☐ Ácido                      ☐ Dulce                      ☐ Intenso  
☐ Amargo                  ☐ Suave                    ☐ Insípido

2.3 Una vez catada la muestra, ¿nota algún sabor residual?

☐ Sí                                      ☐ No

2.4 En caso afirmativo, lo puede describir como:

☐ No me gusta nada      ☐ No me gusta mucho      ☐ Me gusta      ☐ Me gusta mucho

2.5 ¿Con qué sabor/es identifica la muestra?: \_\_\_\_\_

2.6 Comentarios

**3. ¿Qué puntuación designaría a la fórmula objeto de estudio? (puede indicar decimales)**

3    –    2    –    3    –    4    –    5    –    6    –    7    –    8    –    9    –    10

**4. Comentarios adicionales**

**FIN DEL TEST**

**MUCHAS GRACIAS POR SU PARTICIPACIÓN**

**¿ALGÚN COMENTARIO FINAL?:**
